# Supplementary material
Source: PubMed Central journal article supplement (PMC6902184)
Supplement: jamaoncol-6-92-s001.pdf [file jamaoncol-6-92-s001.pdf]

## Supplementary Online Content

Mayadev JS, Enserro D, Lin YG, et al. Sequential ipilimumab after chemoradiotherapy in curative-intent treatment of patients with node-positive cervical cancer. *JAMA Oncol*. Published online November 27, 2019. doi:10.1001/jamaoncol.2019.3857

**eTable 1.** Grade  $\geq 3$  Treatment-Related Adverse Events During Ipilimumab

**eTable 2.** Analysis Relating HPV Genotype and HLA-A\*0201 Status Variables to PFS

**eTable 3.** Analysis Relating HPV Genotype and HLA-A\*0201 Status Variables to OS

**eTable 4.** Analysis Relating PBMC PD-1 Expression Change From Baseline to Post-CRT to PFS

**eTable 5.** Analysis Relating PBMC PD-1 Expression Change From Baseline to Post-CRT to OS

This supplementary material has been provided by the authors to give readers additional information about their work.

**eTable 1.** Grade  $\geq 3$  Treatment-Related Adverse Events During Ipilimumab

| System Organ Class/Term                | Treatment/Adverse Event Grade    |          |                                   |          |
|----------------------------------------|----------------------------------|----------|-----------------------------------|----------|
|                                        | Ipilimumab 3 mg/kg every 3 weeks |          | Ipilimumab 10 mg/kg every 3 weeks |          |
|                                        | 3                                | $\geq 4$ | 3                                 | $\geq 4$ |
| <b>Blood/Lymphatics</b>                | <b>1</b>                         | <b>0</b> | <b>1</b>                          | <b>0</b> |
| Anemia                                 | 1                                | 0        | 1                                 | 0        |
| <b>Gastrointestinal</b>                | <b>1</b>                         | <b>0</b> | <b>1</b>                          | <b>0</b> |
| Abdominal pain                         | 0                                | 0        | 1                                 | 0        |
| Nausea                                 | 1                                | 0        | 0                                 | 0        |
| Vomiting                               | 1                                | 0        | 0                                 | 0        |
| <b>General and administration site</b> | <b>1</b>                         | <b>0</b> | <b>0</b>                          | <b>0</b> |
| Fatigue                                | 1                                | 0        | 0                                 | 0        |
| <b>Infections/infestations</b>         | <b>1</b>                         | <b>0</b> | <b>0</b>                          | <b>0</b> |
| Urinary tract infection                | 1                                | 0        | 0                                 | 0        |
| <b>Investigations</b>                  | <b>0</b>                         | <b>0</b> | <b>4</b>                          | <b>0</b> |
| Lipase increased                       | 0                                | 0        | 1                                 | 0        |
| Lymphocyte count decreased             | 0                                | 0        | 2                                 | 0        |
| Neutrophil count decreased             | 0                                | 0        | 1                                 | 0        |
| Platelet count decreased               | 0                                | 0        | 1                                 | 0        |
| <b>Nervous system</b>                  | <b>1</b>                         | <b>0</b> | <b>0</b>                          | <b>0</b> |
| Cognitive disturbance                  | 1                                | 0        | 0                                 | 0        |
| <b>Renal/urinary</b>                   | <b>0</b>                         | <b>0</b> | <b>1</b>                          | <b>0</b> |
| Urinary tract obstruction              | 0                                | 0        | 1                                 | 0        |
| <b>Skin/subcutaneous</b>               | <b>0</b>                         | <b>0</b> | <b>1</b>                          | <b>0</b> |

|                         | Treatment/Adverse Event Grade    |    |                                   |    |
|-------------------------|----------------------------------|----|-----------------------------------|----|
|                         | Ipilimumab 3 mg/kg every 3 weeks |    | Ipilimumab 10 mg/kg every 3 weeks |    |
| System Organ Class/Term | 3                                | ≥4 | 3                                 | ≥4 |
| Rash maculo-papular     | 0                                | 0  | 1                                 | 0  |
|                         |                                  |    |                                   |    |

**eTable 2. Analysis Relating HPV Genotype and HLA-A\*0201 Status Variables to PFS**

| <b>Status</b> | <b>Variable</b> | <b>PFS events</b> | <b>N at risk</b> | <b>HR</b> | <b>95% CI LL</b> | <b>95% CI UL</b> | <b>p-value</b> |
|---------------|-----------------|-------------------|------------------|-----------|------------------|------------------|----------------|
| Positive      | HLA-A0201       | 3                 | 20               | 0.796     | 0.072            | 8.785            | 0.8523         |
| Positive      | HPV16           | 3                 | 20               | 0.390     | 0.035            | 4.307            | 0.4424         |
| Positive      | HPV18           | 3                 | 20               | 3.620     | 0.325            | 40.277           | 0.2953         |

**eTable 3. Analysis Relating HPV Genotype and HLA-A\*0201 Status Variables to OS**

| <b>Status</b> | <b>Variable</b> | <b>OS events</b> | <b>N at risk</b> | <b>HR</b> | <b>95% CI LL</b> | <b>95% CI UL</b> | <b>p-value</b> |
|---------------|-----------------|------------------|------------------|-----------|------------------|------------------|----------------|
| Positive      | HLA-A0201       | 2                | 20               | 1.604     | 0.100            | 25.677           | 0.7386         |
| Positive      | HPV16           | 2                | 20               | 0.771     | 0.048            | 12.347           | 0.8544         |
| Positive      | HPV18           | 2                | 20               | 6.940     | 0.428            | 112.549          | 0.1729         |

**eTable 4.** Analysis Relating PBMC PD-1 Expression Change From Baseline to Post-CRT to PFS

| <b>Change</b>  | <b>TR Variable</b> | <b>PFS events</b> | <b>N at risk</b> | <b>HR</b> | <b>95% CI LL</b> | <b>95% CI UL</b> | <b>p-value</b> |
|----------------|--------------------|-------------------|------------------|-----------|------------------|------------------|----------------|
| CRT - Baseline | % CD4 PD1+         | 3                 | 19               | 1.009     | 0.902            | 1.129            | 0.8766         |
| CRT - Baseline | % CD8 PD1+         | 3                 | 19               | 0.994     | 0.845            | 1.170            | 0.9436         |

**eTable 5.** Analysis Relating PBMC PD-1 Expression Change From Baseline to Post-CRT to OS

| <b>Change</b>  | <b>TR Variable</b> | <b>OS events</b> | <b>N at risk</b> | <b>HR</b> | <b>95% CI LL</b> | <b>95% CI UL</b> | <b>p-value</b> |
|----------------|--------------------|------------------|------------------|-----------|------------------|------------------|----------------|
| CRT - Baseline | % CD4 PD1+         | 2                | 19               | 0.975     | 0.851            | 1.117            | 0.7148         |
| CRT - Baseline | % CD8 PD1+         | 2                | 19               | 1.015     | 0.832            | 1.238            | 0.8846         |
